# Supplementary material
Source: publisher site journal article supplement (https://www.dovepress.com/get_supplementary_file.php?f=465135.docx)
Supplement: Supplementary file 1 [file get_supplementary_file.php]

**Supplemental Materials**

**Table S1.** **Baseline characteristics of all participants suffering from large-vessel ischemic stroke in this study.**

**Figure S1. CV distribution of lipid molecules in QC samples.**

**Figure S2. Lipid subclasses molecular numbers and their composition.**

**Figure S3. The correlation coefficient between clinical variables and significant lipid species**

**Figure S4. Potential dysregulated biomarkers revealed by lipidomic for ischemic stroke risk.**

**Table S1. Baseline characteristics of all participants suffering from large-vessel ischemic stroke in this study.**

| **Characteristics** | **Overall**  **(n=116)** | **Non-selected**  **(n=61)** | **Selected**  **(n=55)** | **p-Value** |
| --- | --- | --- | --- | --- |
| Age(years) | 67.1 [59.9, 75.9] | 70.1 [60.1, 77.0] | 66.5 [59.3, 75.8] | 0.621 |
| Female(%) | 54 (46.6) | 28 (45.9) | 26 (47.3) | 1.000 |
| Smoking(%) | 42 (36.2) | 25 (41.0) | 17 (30.9) | 0.350 |
| T2DM(%) | 23 (19.8) | 14 (23.0) | 9 (16.4) | 0.512 |
| LVH(%) | 6 (5.2) | 4 (6.6) | 2 (3.6) | 0.772 |
| AF(%) | 5 (4.3) | 5 (8.2) | 0 (0.0) | 0.087 |
| SBP(mmHg) | 138.0 [130.0, 146.0] | 138.0 [130.0, 146.0] | 138.0 [128.0, 142.0] | 0.596 |
| DBP(mmHg) | 83.0 [78.0, 90.0] | 80.0 [78.0, 88.0] | 86.0 [78.0, 94.0] | 0.222 |
| Bp-lowering agents(%) | 86 (74.1) | 39 (63.9) | 47 (85.5) | 0.015 |
| Lipid-lowering agents(%) | 24 (20.7) | 13 (21.3) | 11 (20.0) | 1.000 |
| Height(cm) | 156.8 (8.3) | 158.1 (7.9) | 155.3 (8.4) | 0.059 |
| Weight(cm) | 63.0 [57.5, 70.0] | 65.0 [57.0, 71.0] | 63.0 [58.5, 70.0] | 0.801 |
| Waist circumference(cm) | 89.3 (9.7) | 88.9 (11.0) | 89.9 (8.1) | 0.577 |
| Body mass index(kg/m2) | 25.8 [23.0, 28.4] | 25.2 [22.7, 27.8] | 26.2 [23.5, 28.6] | 0.314 |
| Total cholesterol(mg/dL) | 209.0 (44.2) | 212.2 (42.8) | 205.6 (45.8) | 0.427 |
| Triglyceride(mg/dL) | 120.2 [97.7, 185.5] | 118.7 [101.7, 179.0] | 131.0 [88.8, 193.5] | 0.998 |
| HDL-C(mg/dL) | 97.3 [85.4, 119.7] | 100.6 [87.7, 120.8] | 93.1 [75.6, 118.5] | 0.243 |
| LDL-C(mg/dL) | 45.6 [40.2, 53.3] | 47.1 [39.6, 56.2] | 44.8 [40.8, 50.0] | 0.375 |
| LDL-C/HDL-C | 2.2 [1.7, 2.7] | 2.3 [1.8, 2.6] | 2.0 [1.6, 2.8] | 0.352 |
| FSP risk stratification(%)a | 32 (27.6) | 16 (26.2) | 16 (29.1) | 0.318 |
| Low risk | 65 (56.0) | 32 (52.5) | 33 (60.0) |  |
| Intermediate risk | 19 (16.4) | 13 (21.3) | 6 (10.9) |  |

Non-selected: the participants suffered from large-vessel ischemic stroke but were not selected to conduct lipidomic profiling. Selected: the participants suffered from large-vessel ischemic stroke and were selected to conduct lipidomic profiling. T2DM: Type 2 diabetes mellitus. LVH: Left ventricular hypertrophy. AF: Atrial fibrillation. HDL-C: High-density lipoprotein. LDL-C: Low-density lipoprotein. FSP: Framingham Stroke Profiles.

a. Framingham Stroke Profiles only included individuals in a limited range, for risk factors lower than limitation, we gave a 0 score, and for those higher than limitation, we gave a maximum score. For example, an 85-year-old woman will get 10 scores in age.


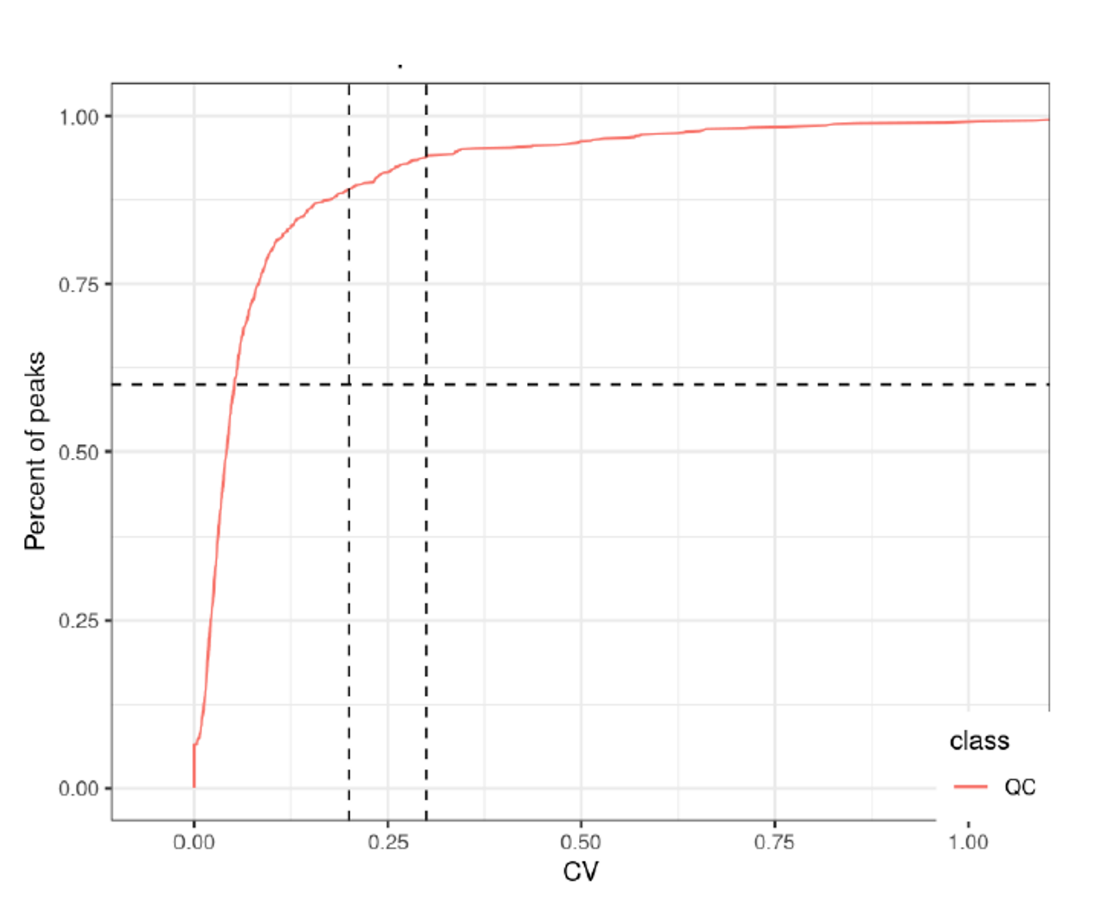


**Figure S1. CV distribution of lipid molecules in QC samples. (CV: coefficient of variation. QC: quality control)**


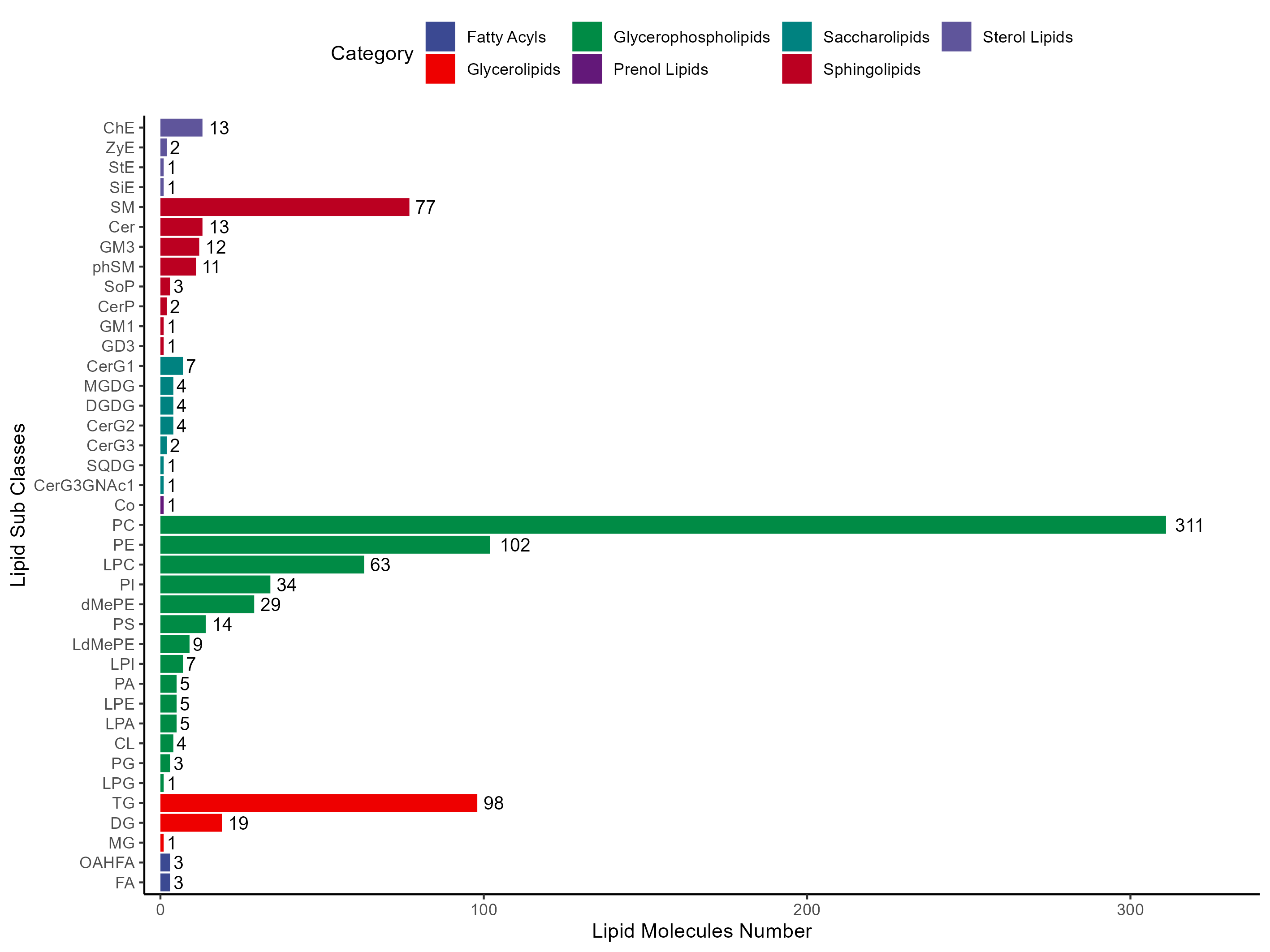


Figure S2. Lipid subclasses molecular numbers and their composition.


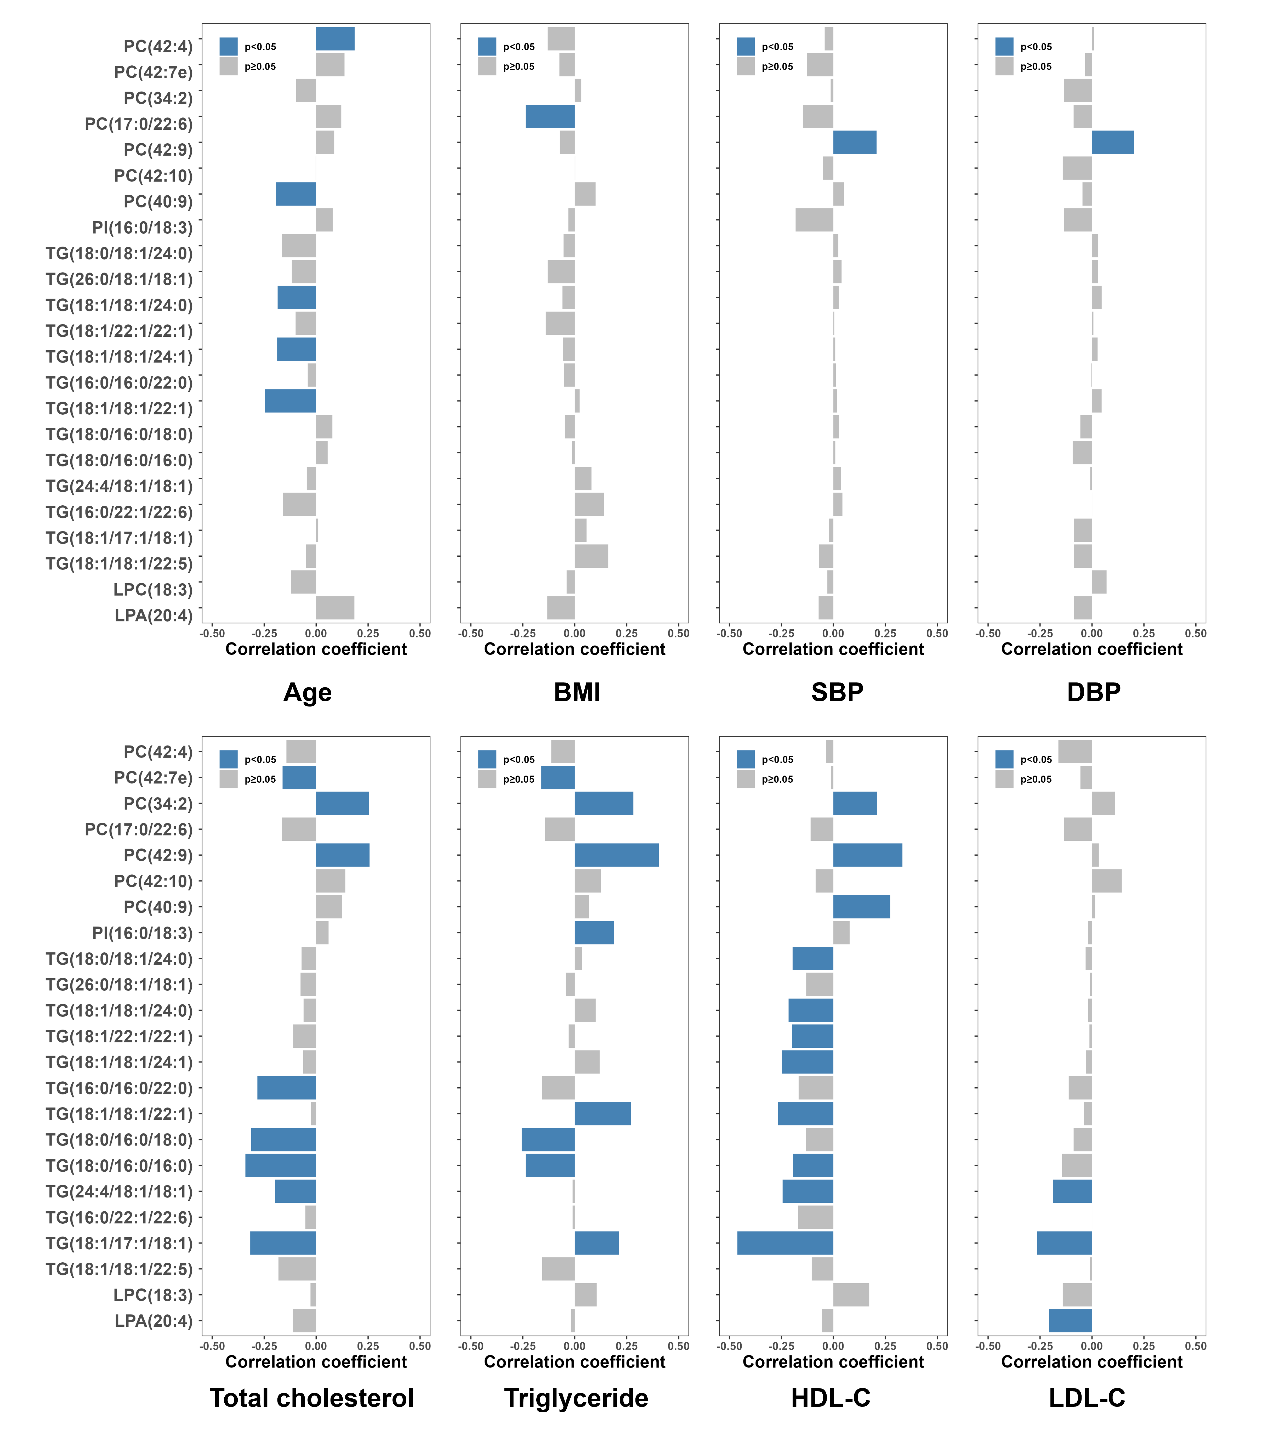


**Figure S3. The correlation coefficient between clinical variables and significant lipid species (SBP: Systolic blood pressure. DBP: Diastolic blood pressure. HDL-C: HDL-C: High-density lipoprotein. LDL-C: Low-density lipoprotein).**


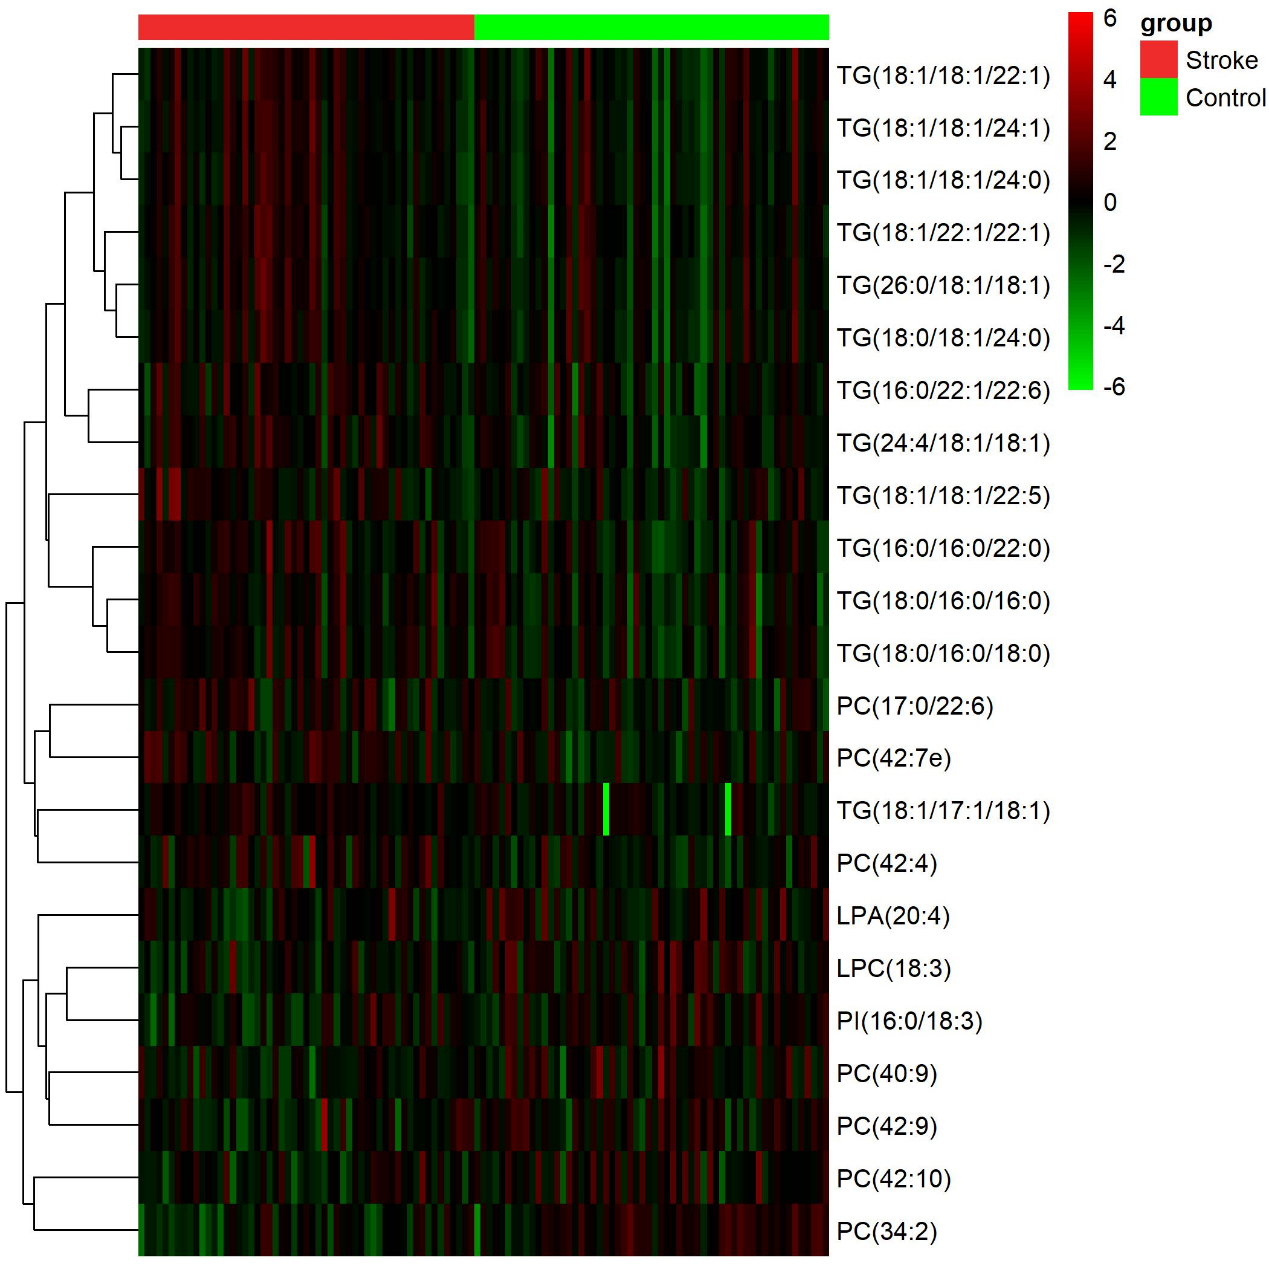


Figure S4. Potential dysregulated biomarkers revealed by lipidomic for ischemic stroke risk (Rows: potential biomarker, columns: sample).
